# Supplementary material for: Modulation of NKG2D ligand expression and metastasis in tumors by spironolactone via RXRγ activation
Source: PubMed Central journal article supplement — J Exp Med. 2013 Nov 18;210(12):2675–92. doi: 10.1084/jem.20122292 (PMC3832934; doi:10.1084/jem.20122292), 2013-11-18
Supplement: supp_jem.20122292_JEM_20122292_sm.pdf [file supp_jem.20122292_JEM_20122292_sm.pdf]

SUPPLEMENTAL MATERIAL

Leung et al., <http://www.jem.org/cgi/content/full/jem.20122292/DC1>

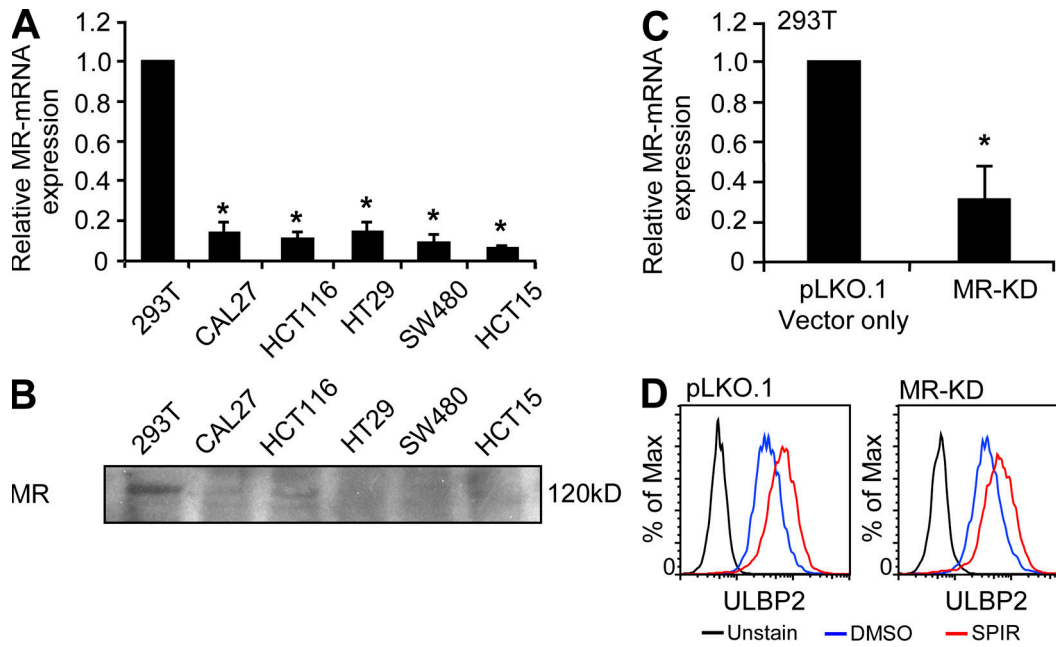

**Figure S1. SPIR's up-regulation of NKG2DL is independent of MR.** (A) MR mRNA expression was determined by qRT-PCR in various cell lines ( $n = 3$ ). (B) MR protein expression was determined by Western blot analysis. Data shown are representative of two independent experiments. (C) MR-knockdown 293T cells were generated by lentiviral transduction with an shRNA vector (pLKO.1) targeting MR. The relative mRNA expression of MR was analyzed by qRT-PCR ( $n = 3$ ). (D) Surface expression of ULBP2 in control and MR-knockdown 293T cells after DMSO or SPIR treatment for 3 d was analyzed by using flow cytometry. Data shown are representative of two independent experiments. \*,  $P < 0.0001$ .

**Table S1.** Colorectal carcinoma cell lines

| Cell line | Dukes' type | Gender | Tumor suppressor gene mutations |            |                        | Oncogene mutations |
|-----------|-------------|--------|---------------------------------|------------|------------------------|--------------------|
|           |             |        | <i>P53</i>                      | <i>APC</i> | $\beta$ <i>catenin</i> | <i>K-Ras</i>       |
| HCT116    | n/a         | M      | -                               | -          | +                      | +                  |
| HT29      | n/a         | F      | +                               | -          | -                      | -                  |
| SW480     | B           | M      | +                               | +          | -                      | +                  |
| HCT15     | C           | M      | +                               | +          | -                      | +                  |
| COLO201   | D           | M      | +                               | +          | +                      | +                  |
| LS174T    | B           | F      | +                               | -          | +                      | +                  |
